# Supplementary material for: Genomes2Drugs: Identifies Target Proteins and Lead Drugs from Proteome Data
Source: PubMed Central journal article supplement (PMC2704375; doi:10.1371/journal.pone.0006195), 2009-07-10
Supplement: pone.0006195.s001.pdf [file pone.0006195.s001.pdf]

## Supplementary data for Toomey *et al.* “Genomes2Drugs: identifies target proteins and lead drugs from proteome data”.

[A]

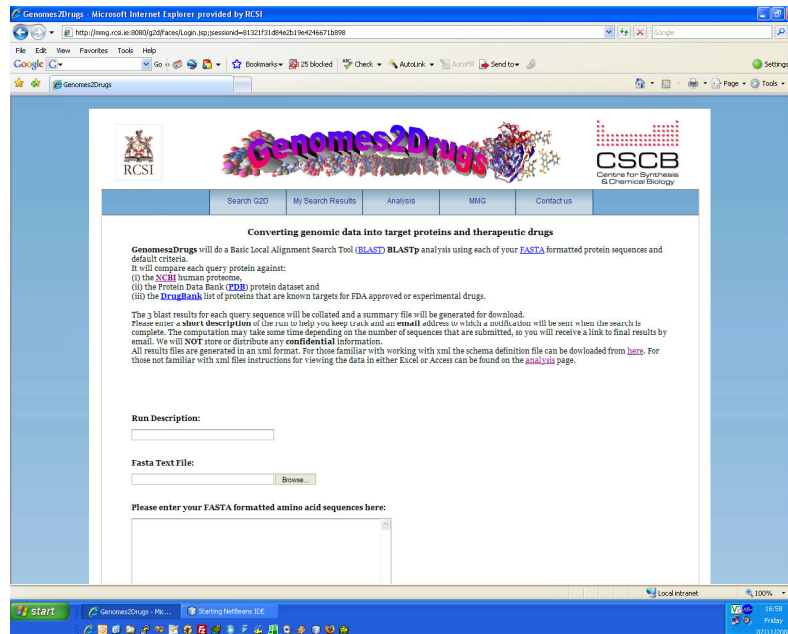

[B]

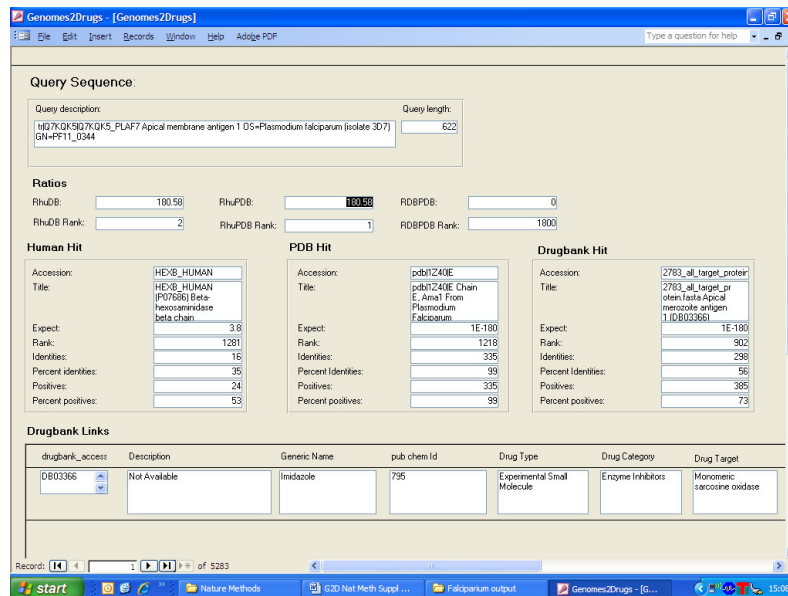

Supplementary Figure S1: Screen shots of the input and output of the online Genomes2Drugs tool.
