# Supplementary material for: Genomes2Drugs: Identifies Target Proteins and Lead Drugs from Proteome Data
Source: PubMed Central journal article supplement (PMC2704375; doi:10.1371/journal.pone.0006195), 2009-07-10
Supplement: pone.0006195.s002.pdf [file pone.0006195.s002.pdf]

## Supplementary data for Toomey *et al.* “Genomes2Drugs: identifies target proteins and lead drugs from proteome data”.

### Supplementary Table S1: Genomes2Drugs search of the *Plasmodium falciparum* proteome.

The FASTA formatted proteome of the malarial parasite *P. falciparum* strain 3D7 was downloaded from EMBL-EBI Interg8. The Genomes2Drugs output was sorted by  $R_{\text{huPDB}}$ . Numerous fields have been removed and abridged for clarity. Putative, uncharacterised proteins likely to be good targets for further analysis are highlighted in blue. PDB homologue titles containing the word ‘plasmodium’ are highlighted in yellow. DrugBank hits associated with malaria, according to NCBI PubMed, are highlighted in green.

| query_title                                                                     | $R_{\text{huPDB}}$ | $R_{\text{huPDB}}$<br>Rank | human_accession | human_<br>expect | pdb_title                                                                                                                                        | pdb_<br>expect | drugbank_title                                                                                                                                     | drugbank_<br>expect |
|---------------------------------------------------------------------------------|--------------------|----------------------------|-----------------|------------------|--------------------------------------------------------------------------------------------------------------------------------------------------|----------------|----------------------------------------------------------------------------------------------------------------------------------------------------|---------------------|
| tr Q7KQK5 Q7KQK5_PLAF7<br>Apical membrane antigen 1                             | 180.6              | 1                          | HEXB_HUMAN      | 3.8              | pdb1Z40IE Chain E, Ama1 From <b>Plasmodium Falciparum</b>                                                                                        | 1E-180         | 2783_all_target_protein.fasta Apical merozoite antigen 1 (DB03366)                                                                                 | 1E-180              |
| tr Q8IBE8 Q8IBE8_PLAF7<br>Erythrocyte binding antigen                           | 178.4              | 2                          | Q8N9N0          | 0.026            | pdb1ZROIB Chain B, Crystal Structure Of Eba-175 Region Ii (Rii) Crystallized In The Presence Of (Alpha)2,3-Sialyllactose                         | 1E-180         | 1688_all_target_protein.fasta <b>NADH dehydrogenase</b> [ubiquinone] 1 subunit C2 (DB00157; DB01136)                                               | 0.48                |
| tr Q6LFB9 Q6LFB9_PLAF7<br>Enoyl-acyl carrier reductase                          | 170.7              | 3                          | PECR_HUMAN      | 0.046            | pdb1VRWIB Chain B, Crystal Structure Analysis Of <b>Plasmodium Falciparum</b> Enoyl-Acyl-Carrier-Protein Reductase With Nadh                     | 1E-172         | 44_all_target_protein.fasta <b>Enoyl-acyl carrier reductase</b> (DB01907)                                                                          | 1E-180              |
| tr Q8ILB1 Q8ILB1_PLAF7<br>NAD(P)H-dependent glutamate synthase, <b>putative</b> | 165.9              | 4                          | DPYD_HUMAN      | 7E-15            | pdb1EA0IB Chain B, Alpha Subunit Of A. Brasilense Glutamate Synthase                                                                             | 1E-180         | 38_all_target_protein.fasta Ferredoxin-dependent glutamate synthase 2 (DB02926; DB03247; DB04184)                                                  | 1E-180              |
| tr Q8IJH3 Q8IJH3_PLAF7<br>Orotidine 5'-phosphate decarboxylase                  | 162.5              | 5                          | PYR5_HUMAN      | 0.32             | pdb2F84IA Chain A, Crystal Structure Of An Orotidine-5'-Monophosphate Decarboxylase Homolog From <b>P.Falciparum</b>                             | 1E-163         | 2452_all_target_protein.fasta <b>Orotidine 5'-phosphate decarboxylase</b> (DB01915; DB02202; DB02309; DB02890; DB02957; DB03403; DB03685; DB03718) | 0.0002              |
| tr Q8I5F4 Q8I5F4_PLAF7<br><b>Putative uncharacterized</b> protein               | 156.4              | 6                          | AHNK_HUMAN      | 2.7              | pdb2B30ID Chain D, Initial Crystallographic Structural Analysis Of A Putative HadCOF-Like Hydrolase From <b>Plasmodium Vivax</b>                 | 1E-156         | 4342_all_target_protein.fasta Phosphoglycolate phosphatase (DB01942)                                                                               | 2E-07               |
| tr Q8ILT0 Q8ILT0_PLAF7<br>NADP-specific glutamate dehydrogenase                 | 151.5              | 7                          | DHE4_HUMAN      | 3E-29            | pdb2BMAIF Chain F, The Crystal Structure Of <b>Plasmodium Falciparum</b> Glutamate Dehydrogenase, A Putative Target For Novel Antimalarial Drugs | 1E-180         | 67_all_target_protein.fasta <b>Glutamate dehydrogenase</b> (DB01907)                                                                               | 2E-36               |
| tr Q8ILJ7 Q8ILJ7_PLAF7<br>Phosphoenolpyruvate carboxylase                       | 148.8              | 8                          | VTDB_HUMAN      | 6.3              | pdb1JQOIB Chain B, Crystal Structure Of C4-Form Phosphoenolpyruvate Carboxylase From Maize                                                       | 1E-148         | 2554_all_target_protein.fasta Phosphoenolpyruvate carboxylase (DB04317)                                                                            | 1E-130              |
| tr Q8I3X4 Q8I3X4_PLAF7<br>Uridine phosphorylase, <b>putative</b>                | 143.5              | 9                          | UPP2_HUMAN      | 3                | pdb1Q1GIF Chain F, Crystal Structure Of <b>Plasmodium Falciparum</b> Pnp With 5'-Methylthio-Immucillin-H                                         | 1E-143         | 3815_all_target_protein.fasta Uridine phosphorylase, putative (DB03743; DB03881; DB04402)                                                          | 1E-144              |
| tr Q76NM3 Q76NM3_PLAF7<br>L-lactate dehydrogenase                               | 141.8              | 10                         | LDHC_HUMAN      | 6E-39            | pdb1CEQA Chain A, Chloroquine Binds In The Cofactor Binding Site Of <b>Plasmodium Falciparum</b> Lactate Dehydrogenase                           | 1E-180         | 2579_all_target_protein.fasta <b>L-lactate dehydrogenase</b> (DB01907; DB02111; DB02401; DB02737; DB03162; DB03940; DB04640; DB04641)              | 1E-180              |

|                                                                                                                                                                      |       |    |             |       |                                                                                                                                                                                                                                                     |        |                                                                                                                                                                   |        |
|----------------------------------------------------------------------------------------------------------------------------------------------------------------------|-------|----|-------------|-------|-----------------------------------------------------------------------------------------------------------------------------------------------------------------------------------------------------------------------------------------------------|--------|-------------------------------------------------------------------------------------------------------------------------------------------------------------------|--------|
| tr Q8IB03 Q8IB03_PLAF7<br>Putative uncharacterized protein<br>PF08_0063                                                                                              | 138.6 | 11 | CLPB_HUMAN  | 4E-42 | pdb11QVRIC Chain C, Crystal Structure<br>Analysis Of Clpb                                                                                                                                                                                           | 1E-180 | 1453_all_target_protein.fasta<br>Chaperone clpB (DB04395)<br>1877_all_target_protein.fasta<br>Transketolase 1 (DB01658;<br>DB01682; DB01987; DB02814;<br>DB03937) | 1E-180 |
| tr Q6LFF9 Q6LFF9_PLAF7<br>Transketolase, putative                                                                                                                    | 138.3 | 12 | TKT_HUMAN   | 2E-42 | pdb11GPUIB Chain B, Transketolase Complex<br>With Reaction Intermediate                                                                                                                                                                             | 1E-180 | 2060_all_target_protein.fasta<br>Plasmepsin-2 (DB02505; DB03063;<br>DB04373; DB04378)                                                                             | 1E-161 |
| tr Q8IM16 Q8IM16_PLAF7<br>Plasmepsin, putative                                                                                                                       | 135.9 | 13 | CATD_HUMAN  | 8E-45 | pdb11LS5IB Chain B, Crystal Structure Of<br>Plasmepsin Iv From <i>P. Falciparum</i> In Complex<br>With Pepstatin A                                                                                                                                  | 1E-180 | 1716_all_target_protein.fasta<br>Phosphoenolpyruvate carboxykinase<br>[ATP] (DB02737; DB03431;<br>DB04184)                                                        | 1E-113 |
| tr Q8IDR1 Q8IDR1_PLAF7<br>Phosphoenolpyruvate                                                                                                                        | 135.4 | 14 | PTN13_HUMAN | 2.7   | pdb11II2IB Chain B, Crystal Structure Of<br>Phosphoenolpyruvate Carboxykinase (Pepck)<br>From <i>Trypanosoma Cruzi</i>                                                                                                                              | 1E-135 | 2060_all_target_protein.fasta<br>Plasmepsin-2 (DB02505; DB03063;<br>DB04373; DB04378)                                                                             | 1E-180 |
| tr Q8I6V3 Q8I6V3_PLAF7<br>Plasmepsin 2                                                                                                                               | 132.3 | 15 | CATD_HUMAN  | 2E-48 | pdb12BJUIA Chain A, Plasmepsin Ii Complexed<br>With A Highly Active Achiral Inhibitor                                                                                                                                                               | 1E-180 | 2060_all_target_protein.fasta<br>Plasmepsin-2 (DB02505; DB03063;<br>DB04373; DB04378)                                                                             | 1E-180 |
| spl Q7KQM4 PLM1_PLAF7<br>Plasmepsin-1                                                                                                                                | 129.5 | 16 | RENI_HUMAN  | 3E-51 | pdb12BJUIA Chain A, Plasmepsin Ii Complexed<br>With A Highly Active Achiral Inhibitor<br>pdb12BMAIF Chain F, The Crystal Structure Of<br><i>Plasmodium Falciparum</i> Glutamate<br>Dehydrogenase, A Putative Target For Novel<br>Antimalarial Drugs | 1E-180 | 67_all_target_protein.fasta<br>Glutamate<br>dehydrogenase (DB01907)<br>2060_all_target_protein.fasta<br>Plasmepsin-2 (DB02505; DB03063;<br>DB04373; DB04378)      | 6E-51  |
| tr Q8IM15 Q8IM15_PLAF7<br>HAP protein GN=PF14_0078                                                                                                                   | 119.6 | 18 | RENI_HUMAN  | 4E-36 | pdb12BJUIA Chain A, Plasmepsin Ii Complexed<br>With A Highly Active Achiral Inhibitor                                                                                                                                                               | 1E-155 | 4308_all_target_protein.fasta<br>Adenosine deaminase (DB02096;<br>DB02616; DB02830; DB03015;<br>DB03220; DB03370; DB03572)                                        | 1E-155 |
| tr Q8IJA9 Q8IJA9_PLAF7<br>Adenosine deaminase, putative                                                                                                              | 116.3 | 19 | ADA_HUMAN   | 2E-22 | pdb12AMXIB Chain B, Crystal Structure Of<br><i>Plasmodium</i> Yoelii Adenosine Deaminase<br>(Py02076)                                                                                                                                               | 1E-138 | 1453_all_target_protein.fasta<br>Chaperone clpB (DB04395)                                                                                                         | 8E-26  |
| tr Q8IIJ8 Q8IIJ8_PLAF7<br>Heat shock protein 101, putative                                                                                                           | 114.0 | 20 | CLPB_HUMAN  | 1E-37 | pdb11QVRIC Chain C, Crystal Structure<br>Analysis Of Clpb<br>pdb11KZHIB Chain B, Structure Of A<br>Pyrophosphate-Dependent Phosphofructokinase<br>From The Lyme Disease Spirochete <i>Borrelia</i><br><i>Burgdorferi</i>                            | 1E-151 | 1300_all_target_protein.fasta<br>6-<br>phosphofructokinase (DB02726;<br>DB04493)                                                                                  | 1E-152 |
| tr Q8I2Z8 Q8I2Z8_PLAF7<br>6-phosphofructokinase, putative                                                                                                            | 111.3 | 21 | K6PL_HUMAN  | 0.002 | pdb11TV5IA Chain A, <i>Plasmodium Falciparum</i><br>Dihydroorotate Dehydrogenase With A Bound<br>Inhibitor                                                                                                                                          | 1E-114 | 3153_all_target_protein.fasta<br>Dihydroorotate dehydrogenase<br>homolog, mitochondrial (DB00263;<br>DB00359; DB00664; DB01145)                                   | 8E-11  |
| spl Q08210 PYRD_PLAF7<br>Dihydroorotate dehydrogenase<br>homolog, mitochondrial<br>tr Q8I2S7 Q8I2S7_PLAF7<br>3-oxoacyl-(Acyl-carrier protein)<br>reductase, putative | 110.3 | 22 | PYRD_HUMAN  | 2E-70 | pdb12C07IA Chain A, Oxoacyl-Acp Reductase<br>Of <i>Plasmodium Falciparum</i>                                                                                                                                                                        | 1E-180 | 3052_all_target_protein.fasta<br>3-<br>oxoacyl-[acyl-carrier-protein]<br>reductase (DB03461)                                                                      | 1E-180 |
| tr Q8IEU2 Q8IEU2_PLAF7<br><i>Plasmodium falciparum</i> gamete<br>antigen 27/25                                                                                       | 106.6 | 23 | DHB8_HUMAN  | 4E-43 | 2135_all_target_protein.fasta<br>Voltage-dependent L-type calcium<br>channel subunit alpha-1C (DB00270;<br>DB00308; DB00622; DB00653;<br>DB00661; DB01388)                                                                                          | 1E-149 |                                                                                                                                                                   | 7E-66  |
|                                                                                                                                                                      | 105.7 | 24 | Q5R336      | 4.6   | pdb11N81IA Chain A, Crystal Structure Of Pfg27<br>From <i>Plasmodium Falciparum</i>                                                                                                                                                                 | 1E-105 |                                                                                                                                                                   | 1.1    |

|                                                                                                                                                           |       |    |             |       |                                                                                                                               |        |                                                                                                                              |        |
|-----------------------------------------------------------------------------------------------------------------------------------------------------------|-------|----|-------------|-------|-------------------------------------------------------------------------------------------------------------------------------|--------|------------------------------------------------------------------------------------------------------------------------------|--------|
| tr Q8I5P5 Q8I5P5_PLAF7<br>Glycerol-3-phosphate<br>dehydrogenase, <b>putative</b>                                                                          | 103.0 | 25 | Q8N335      | 1E-77 | pdb 1YJ8 C Chain C, Initial Structural Analysis Of <b>Plasmodium Falciparum</b> Glycerol-3-Phosphate Dehydrogenase            | 1E-180 | 4420_all_target_protein.fasta<br>Glycerol-3-phosphate dehydrogenase [NAD+], cytoplasmic (DB00157)                            | 5E-75  |
| tr Q8I377 Q8I377_PLAF7 ATP-dependent heat shock protein, <b>putative</b>                                                                                  | 102.3 | 26 | CLPX_HUMAN  | 2E-09 | pdb 1D00 F Chain F, Orthorhombic Crystal Form Of Heat Shock Locus U (Hslu) From Escherichia Coli                              | 1E-111 | 2254_all_target_protein.fasta ATP-dependent hsl protease ATP-binding subunit hslU (DB04395)                                  | 1E-111 |
| tr Q8I4Y0 Q8I4Y0_PLAF7<br>Kinesin-like protein, <b>putative</b>                                                                                           | 99.8  | 27 | Q5T7B7      | 6E-81 | pdb 1RY6 A Chain A, Crystal Structure Of Internal Kinesin Motor Domain                                                        | 1E-180 | 1827_all_target_protein.fasta<br>Kinesin-like protein KIF2C (DB03431; DB04395)                                               | 3E-79  |
| tr Q8I3W2 Q8I3W2_PLAF7<br>Ribose 5-phosphate epimerase, <b>putative</b>                                                                                   | 97.3  | 28 | RPIA_HUMAN  | 2E-28 | pdb 2F8M B Chain B, Ribose 5-Phosphate Isomerase From <b>Plasmodium Falciparum</b>                                            | 1E-125 | 180_all_target_protein.fasta Ribose-5-phosphate isomerase A (DB01756)                                                        | 1E-29  |
| tr Q76NM5 Q76NM5_PLAF7<br>Erythrocyte binding antigen 140                                                                                                 | 97.3  | 29 | REST_HUMAN  | 9     | pdb 1ZRO B Chain B, Crystal Structure Of Eba-175 Region Ii (Rii) Crystallized In The Presence Of (Alpha)2,3-Sialyllactose     | 5E-97  | 359_all_target_protein.fasta <b>NADH dehydrogenase</b> [ubiquinone] 1 alpha subcomplex subunit 10, mitochondrial (DB00157)   | 3.2    |
| tr Q6LEZ4 Q6LEZ4_PLAF7<br>Putative 6-pyruvoyl tetrahydropterin synthase (6-pyruvoyl tetrahydropterin synthase, <b>putative</b> )                          | 96.1  | 30 | BRD7_HUMAN  | 0.4   | pdb 1Y13 C Chain C, Structural Analysis Of <b>Plasmodium Falciparum</b> 6-Pyruvoyl Tetrahydropterin Synthase (Ptps)           | 3E-97  | 52_all_target_protein.fasta 6-pyruvoyl tetrahydrobiopterin synthase (DB03886)                                                | 0.13   |
| sp Q8ILQ7 GST_PLAF7<br>Glutathione S-transferase                                                                                                          | 93.9  | 31 | PTGD2_HUMAN | 7E-18 | pdb 2AAW C Chain C, Studies On Ligand Binding And Enzyme Inhibition Of <b>Plasmodium Falciparum</b> Glutathione S-Transferase | 1E-111 | 2834_all_target_protein.fasta<br><b>Glutathione S-transferase</b> (DB01942; DB04132)                                         | 1E-112 |
| tr Q8IJ7 Q8IJ7_PLAF7<br>Deoxyribose-phosphate aldolase, <b>putative</b>                                                                                   | 92.6  | 32 | DEOC_HUMAN  | 4E-22 | pdb 2A4A B Chain B, Deoxyribose-Phosphate Aldolase From P. Yoelii                                                             | 1E-114 | 4149_all_target_protein.fasta<br>Deoxyribose-phosphate aldolase (DB04087)                                                    | 4E-32  |
| tr Q8ILQ2 Q8ILQ2_PLAF7<br>Glutathione reductase                                                                                                           | 91.3  | 33 | GSHR_HUMAN  | 2E-89 | pdb 1ONF A Chain A, Crystal Structure Of <b>Plasmodium Falciparum</b> Glutathione Reductase                                   | 1E-180 | 1508_all_target_protein.fasta<br><b>Glutathione reductase</b> (DB03147)                                                      | 1E-180 |
| sp Q7KQM0 TPIS_PLAF7<br>Triosephosphate isomerase                                                                                                         | 87.3  | 34 | Q6FHP9      | 2E-58 | pdb 1O5X B Chain B, <b>Plasmodium Falciparum</b> Tim Complexed To 2-Phosphoglycerate                                          | 1E-145 | 3437_all_target_protein.fasta<br><b>Triosephosphate isomerase</b> (DB01709; DB01779; DB02515; DB02726; DB02951; DB04510)     | 1E-146 |
| tr Q8I372 Q8I372_PLAF7<br>Formylmethionine deformylase, <b>putative</b>                                                                                   | 85.6  | 35 | DEFM_HUMAN  | 4E-16 | pdb 1RL4 B Chain B, <b>Plasmodium Falciparum</b> Peptide Deformylase Complex With Inhibitor                                   | 1E-101 | 2132_all_target_protein.fasta<br>Formylmethionine <b>deformylase</b> , putative (DB02625; DB03648)                           | 1E-139 |
| tr Q8I6T4 Q8I6T4_PLAF7<br>Beta-hydroxyacyl-acp<br>dehydratase                                                                                             | 84.4  | 36 | TNFL6_HUMAN | 4.8   | pdb 1Z6B F Chain F, Crystal Structure Of <b>Plasmodium Falciparum</b> Fabz At 2.1 A                                           | 2E-84  | 1863_all_target_protein.fasta 3-hydroxydecanoyl-[acyl-carrier-protein] dehydratase (DB03813)                                 | 0.12   |
| tr Q3V7I1 Q3V7I1_PLAF7<br><b>Putative</b> pyridoxine biosynthetic enzyme pdx1 homologue (Pyridoxine biosynthetic enzyme pdx1 homologue, <b>putative</b> ) | 83.4  | 37 | GOGB1_HUMAN | 0.24  | pdb 1ZNN F Chain F, Structure Of The Synthase Subunit Of Plp Synthase                                                         | 1E-84  | 1988_all_target_protein.fasta<br>Modification methylase RsrI (DB01752; DB01910; DB02282)                                     | 0.92   |
| tr O77330 O77330_PLAF7<br>Asparagine synthetase, <b>putative</b>                                                                                          | 82.7  | 38 | ASNS_HUMAN  | 5E-80 | pdb 1CT9 D Chain D, Crystal Structure Of Asparagine Synthetase B From Escherichia Coli                                        | 1E-162 | 2840_all_target_protein.fasta<br>Asparagine synthetase [glutamine-hydrolyzing] (DB00128; DB00130; DB00142; DB00171; DB00174) | 7E-81  |
| tr Q8I5L3 Q8I5L3_PLAF7 D-ribose-5-phosphate 3-epimerase, <b>putative</b>                                                                                  | 82.5  | 39 | RPE_HUMAN   | 3E-52 | pdb 1TQX B Chain B, Crystal Structure Of PfaI009167 A Putative D-Ribulose 5- Phosphate 3-Epimerase From <b>P.Falciparum</b>   | 1E-134 | 1605_all_target_protein.fasta Delta 1-pyrroline-5-carboxylate synthetase (DB00142)                                           | 0.43   |

|                                                                                                |      |    |              |        |                                                                                                                                                                                                         |        |                                                                                                                                                                                                                                                            |        |
|------------------------------------------------------------------------------------------------|------|----|--------------|--------|---------------------------------------------------------------------------------------------------------------------------------------------------------------------------------------------------------|--------|------------------------------------------------------------------------------------------------------------------------------------------------------------------------------------------------------------------------------------------------------------|--------|
| tr Q8I1R6 Q8I1R6_PLAF7<br>Bifunctional dihydrofolate<br>reductase-thymidylate synthase         | 81.9 | 40 | TYSY_HUMAN   | 8E-99  | pdb1J3KID Chain D, Quadruple Mutant<br>(N51i+c59r+s108n+i164l) <b>Plasmodium<br/>Falciparum</b> Dihydrofolate Reductase-<br>Thymidylate Synthase (Pfdhfr-Ts) Complexed<br>With Wr99210, Nadph, And Dump | 1E-180 | 1991_all_target_protein.fasta<br><b>Bifunctional dihydrofolate reductase-<br/>thymidylate synthase (DB020205;<br/>DB01131)</b><br>4516_all_target_protein.fasta<br>Hypoxanthine-guanine-xanthine<br><b>phosphoribosyltransferase</b><br>(DB02075; DB02212) | 1E-180 |
| tr Q8IJS1 Q8IJS1_PLAF7<br>Hypoxanthine<br>phosphoribosyltransferase                            | 81.0 | 41 | HPRT_HUMAN   | 9E-54  | pdb11CJBID Chain D, <b>Malarial</b> Purine<br>Phosphoribosyltransferase<br>pdb11XIYIB Chain B, Crystal Structure Of<br><b>Plasmodium Falciparum</b> Antioxidant Protein (1-<br>Cys Peroxiredoxin)       | 1E-134 | 1225_all_target_protein.fasta<br><b>Peroxiredoxin</b> (DB03661)<br>1014_all_target_protein.fasta<br><b>Adenylosuccinate synthetase</b><br>(DB02109; DB03510; DB04315)                                                                                      | 1E-134 |
| tr Q8IBG7 Q8IBG7_PLAF7<br>Antioxidant protein, <b>putative</b>                                 | 80.0 | 42 | PRDX5_HUMAN  | 2E-14  | pdb11P9BIA Chain A, Structure Of Fully Ligated<br>Adenylosuccinate Synthetase From <b>Plasmodium<br/>Falciparum</b>                                                                                     | 2E-94  | 1012_all_target_protein.fasta<br><b>Fructose-bisphosphate aldolase A</b><br>(DB02512; DB04326; DB04733)                                                                                                                                                    | 6E-97  |
| tr Q8IDF6 Q8IDF6_PLAF7<br>Adenylosuccinate synthetase                                          | 80.0 | 43 | PURA2_HUMAN  | 1E-100 | pdb11A5CIB Chain B, Fructose-1,6-<br>Bisphosphate Aldolase From <b>Plasmodium<br/>Falciparum</b>                                                                                                        | 1E-180 | 2909_all_target_protein.fasta<br><b>Deoxyuridine 5'-triphosphate<br/>nucleotidohydrolase, putative</b><br>(DB04685)                                                                                                                                        | 1E-180 |
| sp Q7KQL9 ALF_PLAF7<br>Fructose-bisphosphate aldolase                                          | 78.0 | 44 | ALDOC_HUMAN  | 1E-102 | pdb11VYQIC Chain C, Novel Inhibitors Of<br><b>Plasmodium Falciparum</b> Dutpase Provide A<br>Platform For Anti-Malarial Drug Design                                                                     | 1E-180 | 460_all_target_protein.fasta<br>Guanylate kinase (DB01972;<br>DB03431)                                                                                                                                                                                     | 1E-97  |
| tr Q8II92 Q8II92_PLAF7<br>Deoxyuridine 5'-triphosphate<br>nucleotidohydrolase, <b>putative</b> | 76.4 | 45 | DUT_HUMAN    | 7E-08  | pdb11Z6GIA Chain A, Crystal Structure Of<br>Guanylate Kinase From <b>Plasmodium Falciparum</b>                                                                                                          | 3E-84  | 137_all_target_protein.fasta Retinoic<br>acid receptor beta (DB02877)                                                                                                                                                                                      | 2E-84  |
| tr Q8I2M1 Q8I2M1_PLAF7<br>Guanylate kinase, <b>putative</b>                                    | 75.3 | 46 | Q5T435       | 2E-32  | pdb11QUMIA Chain A, Crystal Structure Of<br>Escherichia Coli Endonuclease Iv In Complex<br>With Damaged Dna                                                                                             | 1E-107 | 2730_all_target_protein.fasta <b>1-<br/>deoxy-D-xylulose 5-phosphate<br/>reductoisomerase</b> (DB04184)                                                                                                                                                    | 1E-35  |
| tr Q8IE02 Q8IE02_PLAF7<br>Apurinic/apurimidinic<br>endonuclease Apn1                           | 74.9 | 47 | RARB_HUMAN   | 1.5    | pdb11R0LID Chain D, 1-Deoxy-D-Xylulose 5-<br>Phosphate Reductoisomerase From Zymomonas<br>Mobilis In Complex With Nadph                                                                                 | 2E-75  | 349_all_target_protein.fasta<br>Isovaleryl-CoA dehydrogenase,<br>mitochondrial (DB03147; DB04036)                                                                                                                                                          | 0.18   |
| tr Q8IKG4 Q8IKG4_PLAF7 1-<br>deoxy-D-xylulose 5-phosphate<br>reductoisomerase                  | 73.3 | 48 | No hit found | 1000   | pdb11ZSOIB Chain B, Hypothetical Protein<br>From <b>Plasmodium Falciparum</b>                                                                                                                           | 5E-71  | 568_all_target_protein.fasta<br><b>Superoxide dismutase [Mn],<br/>mitochondrial (DB04436)</b>                                                                                                                                                              | 9E-72  |
| tr Q8IDI8 Q8IDI8_PLAF7<br><b>Putative uncharacterized</b> protein<br>MAL13P1.257               | 72.5 | 49 | Q9NWX4       | 3E-14  | pdb12AWPIB Chain B, Crystal Structure Of<br><b>Plasmodium</b> Knowlesi Structure Of Iron Super-<br>Oxide Dismutase                                                                                      | 1E-86  |                                                                                                                                                                                                                                                            | 0.25   |
| sp Q8IAY6 SODF_PLAF7<br>Superoxide dismutase [Fe]                                              | 70.6 | 50 | Q5TCM1       | 4E-38  |                                                                                                                                                                                                         | 1E-108 |                                                                                                                                                                                                                                                            | 7E-39  |
