# Supplementary material for: Genomes2Drugs: Identifies Target Proteins and Lead Drugs from Proteome Data
Source: PubMed Central journal article supplement (PMC2704375; doi:10.1371/journal.pone.0006195), 2009-07-10
Supplement: pone.0006195.s003.pdf [file pone.0006195.s003.pdf]

**Supplementary data for Toomey *et al.* “Genomes2Drugs: identifies target proteins and lead drugs from proteome data”.**

**Supplementary Table S2: DrugBank DrugCards with keywords “plasmodium” or “malaria”.**

| <b>DB number:</b> | <b>Name:</b>       |
|-------------------|--------------------|
| DB00205           | Pyrimethamine      |
| DB00250           | Dapsone            |
| DB00254           | Doxycycline        |
| DB00256           | Lymecycline        |
| DB00263           | Sulfisoxazole      |
| DB00358           | Mefloquine         |
| DB00453           | Clomocycline       |
| DB00468           | Quinine            |
| DB00608           | Chloroquine        |
| DB00613           | Amodiaquine        |
| DB00618           | Demeclocycline     |
| DB00664           | Sulfametopyrazine  |
| DB01087           | Primaquine         |
| DB01117           | Atovaquone         |
| DB01131           | Proguanil          |
| DB01218           | Halofantrine       |
| DB01299           | Sulfadoxine        |
| DB01611           | Hydroxychloroquine |
